# Supplementary material for: Size dependence in two-dimensional lateral heterostructures of transition metal dichalcogenides
Source: Royal Society of Chemistry journal article supplement (doi:10.1039/c9tc00063a), 2019-01-01
Supplement: c9tc00063a1.pdf [file c9tc00063a1.pdf]

Electronic Supplementary Information for

## Size dependence in two-dimensional lateral heterostructures of transition metal dichalcogenides

Hao Jin,<sup>a</sup> Vincent Michaud-Rioux,<sup>b</sup> Zhi-Rui Gong,<sup>a</sup> Langhui Wan,<sup>a</sup> Yadong Wei,<sup>\*a</sup> and  
Hong Guo,<sup>a,b</sup>

<sup>a</sup> Shenzhen Key Laboratory of Advanced Thin Films and Applications, College of  
Physics and Optoelectronic Engineering, Shenzhen University, Shenzhen 518060,  
China; E-mail: ywei@szu.edu.cn

<sup>b</sup> Centre for the Physics of Materials and Department of Physics, McGill University,  
Montréal H3A 2T8, Canada.

For armchair (zigzag) boundary, it is one-unit length along  $x$  ( $y$ ) direction (see Fig. 1a  
of the manuscript), i.e. 5.51 Å (3.18 Å). While the length along  $y$  ( $x$ ) direction varies.  
To better illustrate the size of the supercell employed in this work, we list the length  
and the number of atoms in Table S1 and S2.

**Table S1.** The length (as labelled in Fig. 1 of the manuscript) and the number of atoms  
employed in the supercell along armchair direction.

| Length (Å) | Number of atoms |
|------------|-----------------|
| 19.1       | 36              |
| 38.2       | 72              |
| 57.3       | 108             |
| 76.4       | 144             |
| 114.6      | 216             |
| 152.8      | 288             |
| 191.0      | 360             |
| 229.2      | 432             |
| 305.5      | 576             |

|              |            |
|--------------|------------|
| <b>343.7</b> | <b>648</b> |
| <b>458.3</b> | <b>864</b> |

**Table S2.** The length (as labelled in Fig. 1 of the manuscript) and the number of atoms employed in the supercell along zigzag direction.

| <b>Length (Å)</b> | <b>Number of atoms</b> |
|-------------------|------------------------|
| <b>44.1</b>       | <b>48</b>              |
| <b>88.2</b>       | <b>96</b>              |
| <b>132.3</b>      | <b>144</b>             |
| <b>176.4</b>      | <b>192</b>             |
| <b>264.6</b>      | <b>288</b>             |
| <b>352.8</b>      | <b>384</b>             |
| <b>441.0</b>      | <b>480</b>             |
| <b>529.2</b>      | <b>576</b>             |
| <b>705.6</b>      | <b>768</b>             |
| <b>882.0</b>      | <b>960</b>             |
| <b>1058.4</b>     | <b>1152</b>            |
| <b>1411.2</b>     | <b>1536</b>            |
| <b>1764.0</b>     | <b>1920</b>            |
| <b>2116.8</b>     | <b>2304</b>            |
| <b>2756.3</b>     | <b>3000</b>            |
| <b>3528.0</b>     | <b>3840</b>            |
| <b>4233.6</b>     | <b>4608</b>            |

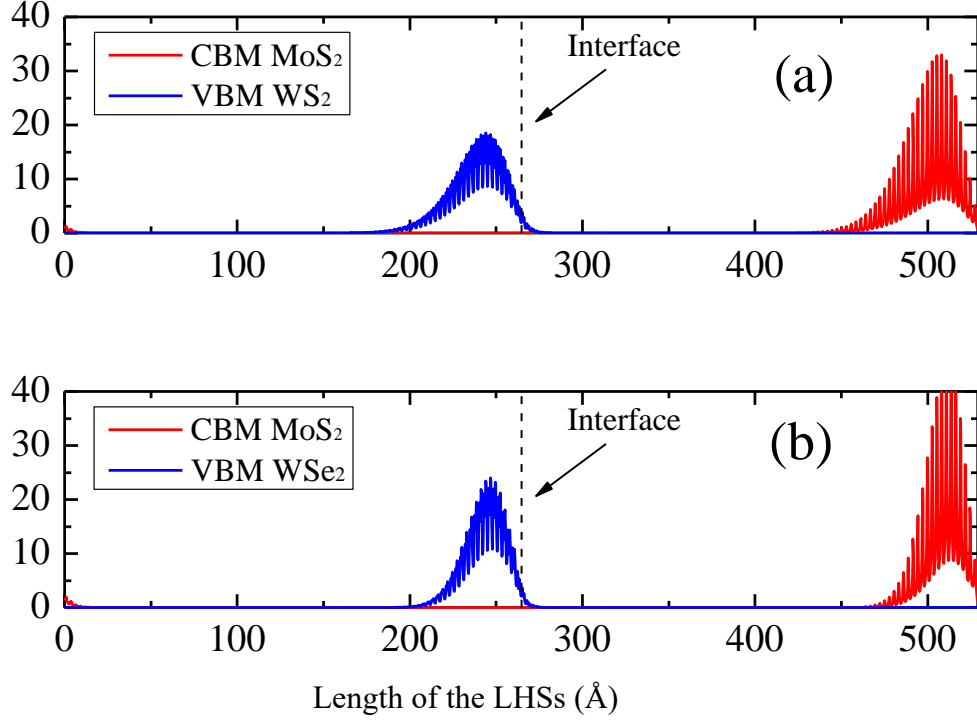

**Fig. S1.** Plane integrated modular square wave functions of the VBM ( $|\psi_v(r)|^2$ ) and CBM ( $|\psi_c(r)|^2$ ) for (a) MoS<sub>2</sub>/WS<sub>2</sub> and (b) MoS<sub>2</sub>/WSe<sub>2</sub> LHSs.

As shown in Fig. R1, the plane integrated modular square wave functions of the VBM ( $|\psi_v(r)|^2$ ) and CBM ( $|\psi_c(r)|^2$ ) of the MoS<sub>2</sub>/WSe<sub>2</sub> LHS are similar to those of MoS<sub>2</sub>/WS<sub>2</sub> LHS. As have been discussed in the manuscript, those wave functions determine the band structures of the LHSs. As such, we believe that MoS<sub>2</sub>/WSe<sub>2</sub> LHS can show similar trend as compared with MoS<sub>2</sub>/WS<sub>2</sub> LHS. Consequently, our conclusions are not limited to MoS<sub>2</sub>/WS<sub>2</sub> LHS, but can be applied to other TMDs LHSs.
